# Supplementary material
Source: PubMed Central journal article supplement (PMC5620983)
Supplement: oc7b00329_si_001.pdf [file oc7b00329_si_001.pdf]

# **Collective Approach to Advancing C–H Functionalization**

*Huw M. L. Davies\* and Daniel Morton\**

Department of Chemistry, Emory University, 1515 Dickey Drive, Atlanta, Georgia  
30322, United States

## **Supporting Information**

Publications of the NSF CCI Center for Selective C–H Functionalization S2-S17

## Phase I Publications

- (1) Trost, B. M.; Malhotra, S.; Olson, D. E.; Maruniak, A.; Du Bois, J. Asymmetric Synthesis of Diamine Derivatives via Sequential Palladium and Rhodium Catalysis. *J. Am. Chem. Soc.* **2009**, *131* (12), 4190–4191 DOI: 10.1021/ja809697p.
- (2) Chen, X.; Engle, K. M.; Wang, D.-H.; Yu, J.-Q. Palladium(II)-Catalyzed C–H Activation/C–C Cross-Coupling Reactions: Versatility and Practicality. *Angew. Chem. Int. Ed.* **2009**, *48* (28), 5094–5115 DOI: 10.1002/anie.200806273.
- (3) Giri, R.; Shi, B.-F.; Engle, K. M.; Mangel, N.; Yu, J.-Q. Transition Metal-Catalyzed C–H Activation Reactions: Diastereoselectivity and Enantioselectivity. *Chem. Soc. Rev.* **2009**, *38* (11), 3242–3272 DOI: 10.1039/B816707A.
- (4) Davies, H. M. L.; Dick, A. R. Functionalization of Carbon–Hydrogen Bonds Through Transition Metal Carbenoid Insertion. In *C-H Activation*; Yu, J.-Q., Shi, Z., Eds.; Topics in Current Chemistry; Springer Berlin Heidelberg, 2009; pp 303–345.
- (5) Zalatan, D. N.; Bois, J. D. Metal-Catalyzed Oxidations of C–H to C–N Bonds. In *C-H Activation*; Yu, J.-Q., Shi, Z., Eds.; Topics in Current Chemistry; Springer Berlin Heidelberg, 2009; pp 347–378.
- (6) Pelphrey, P.; Hansen, J.; Davies, H. M. L. Solvent-Free Catalytic Enantioselective C–C Bond Forming Reactions with Very High Catalyst Turnover Numbers. *Chem. Sci.* **2010**, *1* (2), 254–257 DOI: 10.1039/C0SC00109K.
- (7) Bigi, M. A.; Reed, S. A.; White, M. C. Diverting Non-Haem Iron Catalysed Aliphatic C–H Hydroxylations towards Desaturations. *Nat. Chem.* **2011**, *3* (3), 216–222 DOI: 10.1038/nchem.967.
- (8) Engle, K. M.; Mei, T.-S.; Wang, X.; Yu, J.-Q. Bystanding F<sup>+</sup> Oxidants Enable Selective Reductive Elimination from High-Valent Metal Centers in Catalysis. *Angew. Chem. Int. Ed.* **2011**, *50* (7), 1478–1491 DOI: 10.1002/anie.201005142.
- (9) Davies, H. M. L.; Morton, D. Guiding Principles for Site Selective and Stereoselective Intermolecular C–H Functionalization by Donor/acceptor Rhodium Carbenes. *Chem. Soc. Rev.* **2011**, *40* (4), 1857 DOI: 10.1039/c0cs00217h.
- (10) Davies, H. M. L.; Du Bois, J.; Yu, J.-Q. C–H Functionalization in Organic Synthesis. *Chem. Soc. Rev.* **2011**, *40* (4), 1855 DOI: 10.1039/c1cs90010b.
- (11) Hansen, J. H.; Gregg, T. M.; Ovalles, S. R.; Lian, Y.; Autschbach, J.; Davies, H. M. L. On the Mechanism and Selectivity of the Combined C–H Activation/Cope Rearrangement. *J. Am. Chem. Soc.* **2011**, *133* (13), 5076–5085 DOI: 10.1021/ja111408v.
- (12) Wang, D.-H.; Yu, J.-Q. Highly Convergent Total Synthesis of (+)-Lithospermic Acid via a Late-Stage Intermolecular C–H Olefination. *J. Am. Chem. Soc.* **2011**, *133* (15), 5767–5769 DOI: 10.1021/ja2010225.
- (13) Dai, H.-X.; Stepan, A. F.; Plummer, M. S.; Zhang, Y.-H.; Yu, J.-Q. Divergent C–H Functionalizations Directed by Sulfonamide Pharmacophores: Late-Stage Diversification as a Tool for Drug Discovery. *J. Am. Chem. Soc.* **2011**, *133* (18), 7222–7228 DOI: 10.1021/ja201708f.

- (14) Wu, J.; Becerril, J.; Lian, Y.; Davies, H. M. L.; Porco, J. A.; Panek, J. S. Sequential Transformations to Access Polycyclic Chemotypes: Asymmetric Crotylation and Metal Carbenoid Reactions. *Angew. Chem. Int. Ed.* **2011**, *50* (26), 5938–5942 DOI: 10.1002/anie.201101366.
- (15) Du Bois, J. Rhodium-Catalyzed C–H Amination. An Enabling Method for Chemical Synthesis. *Org. Process Res. Dev.* **2011**, *15* (4), 758–762 DOI: 10.1021/op200046v.
- (16) Lian, Y.; Davies, H. M. L. Combined C–H Functionalization/Cope Rearrangement with Vinyl Ethers as a Surrogate for the Vinylogous Mukaiyama Aldol Reaction. *J. Am. Chem. Soc.* **2011**, *133* (31), 11940–11943 DOI: 10.1021/ja2051155.
- (17) Lian, Y.; Hardcastle, K. I.; Davies, H. M. L. Computationally Guided Stereocontrol of the Combined C–H Functionalization/Cope Rearrangement. *Angew. Chem. Int. Ed.* **2011**, *50* (40), 9370–9373 DOI: 10.1002/anie.201103568.
- (18) Harvey, M. E.; Musaev, D. G.; Du Bois, J. A Diruthenium Catalyst for Selective, Intramolecular Allylic C–H Amination: Reaction Development and Mechanistic Insight Gained through Experiment and Theory. *J. Am. Chem. Soc.* **2011**, *133* (43), 17207–17216 DOI: 10.1021/ja203576p.
- (19) Qin, C.; Boyarskikh, V.; Hansen, J. H.; Hardcastle, K. I.; Musaev, D. G.; Davies, H. M. L. D2-Symmetric Dirhodium Catalyst Derived from a 1,2,2-Triarylcyclopropanecarboxylate Ligand: Design, Synthesis and Application. *J. Am. Chem. Soc.* **2011**, *133* (47), 19198–19204 DOI: 10.1021/ja2074104.
- (20) B. Blakey, S.; L. Bon, J. Synthesis of Ruthenium(II) 2,6-Bis(imino)pyridyl Complexes for C-H Amination of Sulfamate Esters. *HETEROCYCLES* **2012**, *84* (2), 1313 DOI: 10.3987/COM-11-S(P)64.
- (21) Musaev, D. G.; Kaledin, A.; Shi, B.-F.; Yu, J.-Q. Key Mechanistic Features of Enantioselective C–H Bond Activation Reactions Catalyzed by [(Chiral Mono- *N*-Protected Amino Acid)–Pd(II)] Complexes. *J. Am. Chem. Soc.* **2012**, *134* (3), 1690–1698 DOI: 10.1021/ja208661v.
- (22) Engle, K. M.; Mei, T.-S.; Wasa, M.; Yu, J.-Q. Weak Coordination as a Powerful Means for Developing Broadly Useful C–H Functionalization Reactions. *Acc. Chem. Res.* **2012**, *45* (6), 788–802 DOI: 10.1021/ar200185g.
- (23) Roizen, J. L.; Harvey, M. E.; Du Bois, J. Metal-Catalyzed Nitrogen-Atom Transfer Methods for the Oxidation of Aliphatic C–H Bonds. *Acc. Chem. Res.* **2012**, *45* (6), 911–922 DOI: 10.1021/ar200318q.
- (24) Davies, H. M. L.; Lian, Y. The Combined C–H Functionalization/Cope Rearrangement: Discovery and Applications in Organic Synthesis. *Acc. Chem. Res.* **2012**, *45* (6), 923–935 DOI: 10.1021/ar300013t.
- (25) Musaev, D. G.; Blakey, S. B. Insight into Mechanistic Features of Ruthenium(II)–Pybox-Catalyzed C–H Amination. *Organometallics* **2012**, *31* (14), 4950–4961 DOI: 10.1021/om300153q.
- (26) Baxter, R. D.; Sale, D.; Engle, K. M.; Yu, J.-Q.; Blackmond, D. G. Mechanistic Rationalization of Unusual Kinetics in Pd-Catalyzed C–H Olefination. *J. Am. Chem. Soc.* **2012**, *134* (10), 4600–4606 DOI: 10.1021/ja207634t.
- (27) Giri, R.; Lan, Y.; Liu, P.; Houk, K. N.; Yu, J.-Q. Understanding Reactivity and Stereoselectivity in Palladium-Catalyzed Diastereoselective Sp<sup>3</sup> C–H Bond Activation: Intermediate Characterization and Computational Studies. *J. Am. Chem. Soc.* **2012**, *134* (34), 14118–14126 DOI: 10.1021/ja304643e.

- (28) Varela-Álvarez, A.; Liebeskind, L. S.; Musaev, D. G. Mechanistic Insights into the Aerobic Copper(I)-Catalyzed Cross-Coupling of S -Acyl Thiosalicylamide Thiol Esters and Boronic Acids. *Organometallics* **2012**, *31* (22), 7958–7968 DOI: 10.1021/om300612u.
- (29) Davies, H. M. L.; Morton, D. C–C Bond Formation by C–H Bond Activation. In *Stereoselective Synthesis 3: Stereoselective Pericyclic Reaction, Cross-Coupling and C–H and C–X Activation*; **2011**, p 513-566, Ed. P. A. Evans, Wiley.

## Phase II Publications

- (1) Perry, R. H.; Cahill, T. J.; Roizen, J. L.; Du Bois, J.; Zare, R. N. Capturing Fleeting Intermediates in a Catalytic C–H Amination Reaction Cycle. *Proc. Natl. Acad. Sci.* **2012**, *109* (45), 18295–18299 DOI: 10.1073/pnas.1207600109.
- (2) Olson, D. E.; Roberts, D. A.; Du Bois, J. Synthesis of Differentially Substituted 1,2-Diamines through Advances in C–H Amination Technology. *Org. Lett.* **2012**, *14* (24), 6174–6177 DOI: 10.1021/ol302895f.
- (3) Bigi, M.; Liu, P.; Zou, L.; Houk, K.; White, M. Cafestol to Tricalysiolide B and Oxidized Analogues: Biosynthetic and Derivatization Studies Using Non-Heme Iron Catalyst Fe(PDP). *Synlett* **2012**, *23* (19), 2768–2772 DOI: 10.1055/s-0032-1317708.
- (4) He, J.; Wasa, M.; Chan, K. S. L.; Yu, J.-Q. Palladium(0)-Catalyzed Alkynylation of C(sp<sup>3</sup>)–H Bonds. *J. Am. Chem. Soc.* **2013**, *135* (9), 3387–3390 DOI: 10.1021/ja400648w.
- (5) Okamoto, K.; Housekeeper, J. B.; Michael, F. E.; Luscombe, C. K. Thiophene Based Hyperbranched Polymers with Tunable Branching Using Direct Arylation Methods. *Polym. Chem.* **2013**, *4* (12), 3499 DOI: 10.1039/c3py00412k.
- (6) Owens, C. P.; Varela-Álvarez, A.; Boyarskikh, V.; Musaev, D. G.; Davies, H. M. L.; Blakey, S. B. Iridium(III)-Bis(oxazolonyl)phenyl Catalysts for Enantioselective C–H Functionalization. *Chem. Sci.* **2013**, *4* (6), 2590 DOI: 10.1039/c3sc50886b.
- (7) Wang, H.; Guptill, D. M.; Varela-Álvarez, A.; Musaev, D. G.; Davies, H. M. L. Rhodium-Catalyzed Enantioselective Cyclopropanation of Electron-Deficient Alkenes. *Chem. Sci.* **2013**, *4* (7), 2844 DOI: 10.1039/c3sc50425e.
- (8) Narayan, A. R. H.; Sherman, D. H. Re-Engineering Nature's Catalysts. *Science* **2013**, *339* (6117), 283–284 DOI: 10.1126/science.1233324.
- (9) Wang, H.; Li, G.; Engle, K. M.; Yu, J.-Q.; Davies, H. M. L. Sequential C–H Functionalization Reactions for the Enantioselective Synthesis of Highly Functionalized 2,3-Dihydrobenzofurans. *J. Am. Chem. Soc.* **2013**, *135* (18), 6774–6777 DOI: 10.1021/ja401731d.
- (10) Chung, K.; Banik, S. M.; De Crisci, A. G.; Pearson, D. M.; Blake, T. R.; Olsson, J. V.; Ingram, A. J.; Zare, R. N.; Waymouth, R. M. Chemoselective Pd-Catalyzed Oxidation of Polyols: Synthetic Scope and Mechanistic Studies. *J. Am. Chem. Soc.* **2013**, *135* (20), 7593–7602 DOI: 10.1021/ja4008694.
- (11) Engle, K. M.; Yu, J.-Q. Developing Ligands for Palladium(II)-Catalyzed C–H Functionalization: Intimate Dialogue between Ligand and Substrate. *J. Org. Chem.* **2013**, *78* (18), 8927–8955 DOI: 10.1021/jo400159y.

- (12) Rosen, B. R.; Simke, L. R.; Thuy-Boun, P. S.; Dixon, D. D.; Yu, J.-Q.; Baran, P. S. C–H Functionalization Logic Enables Synthesis of (+)-Hongoquercin A and Related Compounds. *Angew. Chem. Int. Ed.* **2013**, *52* (28), 7317–7320 DOI: 10.1002/anie.201303838.
- (13) Shibuya, G. M.; Enquist, J. A.; Stoltz, B. M. Enantioselective Synthesis of the 5–6–7 Carbocyclic Core of the Gagunin Diterpenoids. *Org. Lett.* **2013**, *15* (13), 3480–3483 DOI: 10.1021/ol401514s.
- (14) Okamoto, K.; Housekeeper, J. B.; Luscombe, C. K. Room-Temperature Carbon-Sulfur Bond Formation from Ni(II)  $\sigma$ -Aryl Complex via Cleavage of the S–S Bond of Disulfide Moieties: Room Temperature C–S Bond Formation Using Ni(II) and Disulfides. *Appl. Organomet. Chem.* **2013**, *27* (11), 639–643 DOI: 10.1002/aoc.2975.
- (15) Varela-Álvarez, A.; Musaev, D. G. Can Bis(imino)pyridine Iron, (PDI)FeL1L2, Complexes Catalyze C–H Bond Functionalization? *Chem. Sci.* **2013**, *4* (9), 3758 DOI: 10.1039/c3sc51723c.
- (16) Okamoto, K.; Zhang, J.; Housekeeper, J. B.; Marder, S. R.; Luscombe, C. K. C–H Arylation Reaction: Atom Efficient and Greener Syntheses of  $\pi$ -Conjugated Small Molecules and Macromolecules for Organic Electronic Materials. *Macromolecules* **2013**, *46* (20), 8059–8078 DOI: 10.1021/ma401190r.
- (17) Zhang, J.; Singh, S.; Hwang, D. K.; Barlow, S.; Kippelen, B.; Marder, S. R. 2-Bromo Perylene Diimide: Synthesis Using C–H Activation and Use in the Synthesis of Bis(perylene Diimide)–donor Electron-Transport Materials. *J. Mater. Chem. C* **2013**, *1* (33), 5093 DOI: 10.1039/c3tc30918e.
- (18) Figg, T. M.; Wasa, M.; Yu, J.-Q.; Musaev, D. G. Understanding the Reactivity of Pd<sup>0</sup>/PR<sub>3</sub>–Catalyzed Intermolecular C(sp<sup>3</sup>)–H Bond Arylation. *J. Am. Chem. Soc.* **2013**, *135* (38), 14206–14214 DOI: 10.1021/ja4053416.
- (19) Kornecki, K. P.; Briones, J. F.; Boyarskikh, V.; Fullilove, F.; Autschbach, J.; Schrote, K. E.; Lancaster, K. M.; Davies, H. M. L.; Berry, J. F. Direct Spectroscopic Characterization of a Transitory Dirhodium Donor-Acceptor Carbene Complex. *Science* **2013**, *342* (6156), 351–354 DOI: 10.1126/science.1243200.
- (20) Roizen, J. L.; Zalatan, D. N.; Du Bois, J. Selective Intermolecular Amination of C–H Bonds at Tertiary Carbon Centers. *Angew. Chem. Int. Ed.* **2013**, *52* (43), 11343–11346 DOI: 10.1002/anie.201304238.
- (21) Lathrop, S. P.; Movassaghi, M. Application of Diazene-Directed Fragment Assembly to the Total Synthesis and Stereochemical Assignment of (+)-Desmethyl-Meso-Chimonanthine and Related Heterodimeric Alkaloids. *Chem Sci* **2014**, *5* (1), 333–340 DOI: 10.1039/C3SC52451E.
- (22) Schönherr, H.; Cernak, T. Profound Methyl Effects in Drug Discovery and a Call for New C–H Methylation Reactions. *Angew. Chem. Int. Ed.* **2013**, *52* (47), 12256–12267 DOI: 10.1002/anie.201303207.
- (23) Zhang, J.; Chen, W.; Rojas, A. J.; Jucov, E. V.; Timofeeva, T. V.; Parker, T. C.; Barlow, S.; Marder, S. R. Controllable Direct Arylation: Fast Route to Symmetrical and Unsymmetrical 4,7-Diaryl-5,6-Difluoro-2,1,3-Benzothiadiazole Derivatives for Organic Optoelectronic Materials. *J. Am. Chem. Soc.* **2013**, *135* (44), 16376–16379 DOI: 10.1021/ja4095878.
- (24) Usharani, D.; Lacy, D. C.; Borovik, A. S.; Shaik, S. Dichotomous Hydrogen Atom Transfer vs Proton-Coupled Electron Transfer During Activation of X–H Bonds (X = C, N, O) by Nonheme Iron–Oxo Complexes of Variable Basicity. *J. Am. Chem. Soc.* **2013**, *135* (45), 17090–17104 DOI: 10.1021/ja408073m.

- (25) Lewis, J. C. Artificial Metalloenzymes and Metallopeptide Catalysts for Organic Synthesis. *ACS Catal.* **2013**, 3 (12), 2954–2975 DOI: 10.1021/cs400806a.
- (26) Chepiga, K. M.; Feng, Y.; Brunelli, N. A.; Jones, C. W.; Davies, H. M. L. Silica-Immobilized Chiral Dirhodium(II) Catalyst for Enantioselective Carbenoid Reactions. *Org. Lett.* **2013**, 15 (24), 6136–6139 DOI: 10.1021/ol403006r.
- (27) Guptill, D. M.; Cohen, C. M.; Davies, H. M. L. Rhodium(II)-Catalyzed Stereoselective Synthesis of Allylsilanes. *Org. Lett.* **2013**, 15 (24), 6120–6123 DOI: 10.1021/ol4028978.
- (28) Yang, H.; Srivastava, P.; Zhang, C.; Lewis, J. C. A General Method for Artificial Metalloenzyme Formation through Strain-Promoted Azide-Alkyne Cycloaddition. *ChemBioChem* **2014**, 15 (2), 223–227 DOI: 10.1002/cbic.201300661.
- (29) Yang, Y.-F.; Cheng, G.-J.; Liu, P.; Leow, D.; Sun, T.-Y.; Chen, P.; Zhang, X.; Yu, J.-Q.; Wu, Y.-D.; Houk, K. N. Palladium-Catalyzed *Meta*-Selective C–H Bond Activation with a Nitrile-Containing Template: Computational Study on Mechanism and Origins of Selectivity. *J. Am. Chem. Soc.* **2014**, 136 (1), 344–355 DOI: 10.1021/ja410485g.
- (30) Adams, A. M.; Du Bois, J. Organocatalytic C–H Hydroxylation with Oxone<sup>®</sup> Enabled by an Aqueous Fluoroalcohol Solvent System. *Chem Sci* **2014**, 5 (2), 656–659 DOI: 10.1039/C3SC52649F.
- (31) Cheng, G.-J.; Yang, Y.-F.; Liu, P.; Chen, P.; Sun, T.-Y.; Li, G.; Zhang, X.; Houk, K. N.; Yu, J.-Q.; Wu, Y.-D. Role of *N*-Acyl Amino Acid Ligands in Pd(II)-Catalyzed Remote C–H Activation of Tethered Arenes. *J. Am. Chem. Soc.* **2014**, 136 (3), 894–897 DOI: 10.1021/ja411683n.
- (32) Malik, H. A.; Taylor, B. L. H.; Kerrigan, J. R.; Grob, J. E.; Houk, K. N.; Du Bois, J.; Hamann, L. G.; Patterson, A. W. Non-Directed Allylic C–H Acetoxylation in the Presence of Lewis Basic Heterocycles. *Chem. Sci.* **2014**, 5 (6), 2352 DOI: 10.1039/c3sc53414f.
- (33) Green, A. G.; Liu, P.; Merlic, C. A.; Houk, K. N. Distortion/Interaction Analysis Reveals the Origins of Selectivities in Iridium-Catalyzed C–H Borylation of Substituted Arenes and 5-Membered Heterocycles. *J. Am. Chem. Soc.* **2014**, 136 (12), 4575–4583 DOI: 10.1021/ja411699u.
- (34) Musaeu, D. G.; Figg, T. M.; Kaledin, A. L. Versatile Reactivity of Pd-Catalysts: Mechanistic Features of the Mono-*N*-Protected Amino Acid Ligand and Cesium-Halide Base in Pd-Catalyzed C–H Bond Functionalization. *Chem. Soc. Rev.* **2014**, 43 (14), 5009 DOI: 10.1039/c3cs60447k.
- (35) Bess, E. N.; DeLuca, R. J.; Tindall, D. J.; Oderinde, M. S.; Roizen, J. L.; Du Bois, J.; Sigman, M. S. Analyzing Site Selectivity in Rh<sub>2</sub>(esp)<sub>2</sub>-Catalyzed Intermolecular C–H Amination Reactions. *J. Am. Chem. Soc.* **2014**, 136 (15), 5783–5789 DOI: 10.1021/ja5015508.
- (36) Wu, F.; Feng, Y.; Jones, C. W. Recyclable Silica-Supported Iridium Bipyridine Catalyst for Aromatic C–H Borylation. *ACS Catal.* **2014**, 4 (5), 1365–1375 DOI: 10.1021/cs4009539.
- (37) Siler, D. A.; Mighion, J. D.; Sorensen, E. J. An Enantiospecific Synthesis of Jiadifenolide. *Angew. Chem. Int. Ed.* **2014**, 53 (21), 5332–5335 DOI: 10.1002/anie.201402335.
- (38) Zhang, C.; Srivastava, P.; Ellis-Guardiola, K.; Lewis, J. C. Manganese Terpyridine Artificial Metalloenzymes for Benzylic Oxygenation and Olefin Epoxidation. *Tetrahedron* **2014**, 70 (27-28), 4245–4249 DOI: 10.1016/j.tet.2014.03.008.

- (39) Kornecki, K. P.; Berry, J. F.; Powers, D. C.; Ritter, T. Metal–Metal Bond-Containing Complexes as Catalysts for C–H Functionalization. In *Progress in Inorganic Chemistry*; Karlin, K. D., Ed.; John Wiley & Sons, Inc.: Hoboken, New Jersey, 2014; pp 225–302.
- (40) Cannon, J. S.; Zou, L.; Liu, P.; Lan, Y.; O’Leary, D. J.; Houk, K. N.; Grubbs, R. H. Carboxylate-Assisted C(sp<sup>3</sup>)–H Activation in Olefin Metathesis-Relevant Ruthenium Complexes. *J. Am. Chem. Soc.* **2014**, *136* (18), 6733–6743 DOI: 10.1021/ja5021958.
- (41) Fu, L.; Wang, H.; Davies, H. M. L. Role of *Ortho* -Substituents on Rhodium-Catalyzed Asymmetric Synthesis of  $\beta$ -Lactones by Intramolecular C–H Insertions of Aryldiazoacetates. *Org. Lett.* **2014**, *16* (11), 3036–3039 DOI: 10.1021/ol5011505.
- (42) Yu, J.-Q. Directed C–H Activation Reactions of Synthetically Versatile Substrates: A Journey to Practicality. *Adv. Synth. Catal.* **2014**, *356* (7), 1393–1393 DOI: 10.1002/adsc.201400406.
- (43) Qin, C.; Davies, H. M. L. Role of Sterically Demanding Chiral Dirhodium Catalysts in Site-Selective C–H Functionalization of Activated Primary C–H Bonds. *J. Am. Chem. Soc.* **2014**, *136* (27), 9792–9796 DOI: 10.1021/ja504797x.
- (44) Yang, G.; Lindovska, P.; Zhu, D.; Kim, J.; Wang, P.; Tang, R.-Y.; Movassaghi, M.; Yu, J.-Q. Pd(II)-Catalyzed *meta* -C–H Olefination, Arylation, and Acetoxylation of Indolines Using a U-Shaped Template. *J. Am. Chem. Soc.* **2014**, *136* (30), 10807–10813 DOI: 10.1021/ja505737x.
- (45) Flender, C.; Adams, A. M.; Roizen, J. L.; McNeill, E.; Du Bois, J.; Zare, R. N. Speciation and Decomposition Pathways of Ruthenium Catalysts Used for Selective C–H Hydroxylation. *Chem. Sci.* **2014**, *5* (8), 3309 DOI: 10.1039/c4sc01050g.
- (46) Figg, T. M.; Park, S.; Park, J.; Chang, S.; Musaev, D. G. Comparative Investigations of Cp\*-Based Group 9 Metal-Catalyzed Direct C–H Amination of Benzamides. *Organometallics* **2014**, *33* (15), 4076–4085 DOI: 10.1021/om5005868.
- (47) Bon, J. L.; Feng, D.; Marder, S. R.; Blakey, S. B. A C–H Functionalization Protocol for the Direct Synthesis of Benzobisthiazole Derivatives. *J. Org. Chem.* **2014**, *79* (16), 7766–7771 DOI: 10.1021/jo501416j.
- (48) Shang, M.; Wang, H.-L.; Sun, S.-Z.; Dai, H.-X.; Yu, J.-Q. Cu(II)-Mediated *Ortho* C–H Alkynylation of (Hetero)Arenes with Terminal Alkynes. *J. Am. Chem. Soc.* **2014**, *136* (33), 11590–11593 DOI: 10.1021/ja507704b.
- (49) Shang, M.; Sun, S.-Z.; Wang, H.-L.; Laforteza, B. N.; Dai, H.-X.; Yu, J.-Q. Exceedingly Fast Copper(II)-Promoted *ortho* C–H Trifluoromethylation of Arenes Using TMSCF<sub>3</sub>. *Angew. Chem. Int. Ed.* **2014**, *53* (39), 10439–10442 DOI: 10.1002/anie.201404822.
- (50) Spangler, J. E.; Lian, Y.; Raikar, S. N.; Davies, H. M. L. Synthesis of Complex Hexacyclic Compounds via a Tandem Rh(II)-Catalyzed Double-Cyclopropanation/Cope Rearrangement/Diels–Alder Reaction. *Org. Lett.* **2014**, *16* (18), 4794–4797 DOI: 10.1021/ol502257d.
- (51) Davies, H. M. L.; Morton, D. C–H Functionalization: Collaborative Methods to Redefine Chemical Logic. *Angew. Chem. Int. Ed.* **2014**, *53* (39), 10256–10258 DOI: 10.1002/anie.201406633.

- (52) Feng, Y.; Moschetta, E. G.; Jones, C. W. Polymer- and Silica-Supported Iron BPMEN-Inspired Catalysts for C–H Bond Functionalization Reactions. *Chem. - Asian J.* **2014**, *9* (11), 3142–3152 DOI: 10.1002/asia.201402461.
- (53) Xu, H.; Muto, K.; Yamaguchi, J.; Zhao, C.; Itami, K.; Musaev, D. G. Key Mechanistic Features of Ni-Catalyzed C–H/C–O Biaryl Coupling of Azoles and Naphthalen-2-Yl Pivalates. *J. Am. Chem. Soc.* **2014**, *136* (42), 14834–14844 DOI: 10.1021/ja5071174.
- (54) Lu, P.; Mailyan, A.; Gu, Z.; Guptill, D. M.; Wang, H.; Davies, H. M. L.; Zakarian, A. Enantioselective Synthesis of (–)-Maoecrystal V by Enantiodetermining C–H Functionalization. *J. Am. Chem. Soc.* **2014**, *136* (51), 17738–17749 DOI: 10.1021/ja510573v.
- (55) Loach, R. P.; Fenton, O. S.; Amaike, K.; Siegel, D. S.; Ozkal, E.; Movassaghi, M. C7-Derivatization of C3-Alkylindoles Including Tryptophans and Tryptamines. *J. Org. Chem.* **2014**, *79* (22), 11254–11263 DOI: 10.1021/jo502062z.
- (56) Guptill, D. M.; Davies, H. M. L. 2,2,2-Trichloroethyl Aryldiazoacetates as Robust Reagents for the Enantioselective C–H Functionalization of Methyl Ethers. *J. Am. Chem. Soc.* **2014**, *136* (51), 17718–17721 DOI: 10.1021/ja5107404.
- (57) Shang, M.; Sun, S.-Z.; Dai, H.-X.; Yu, J.-Q. Cu(OAc)<sub>2</sub>-Catalyzed Coupling of Aromatic C–H Bonds with Arylboron Reagents. *Org. Lett.* **2014**, *16* (21), 5666–5669 DOI: 10.1021/ol5027377.
- (58) Cook, S. A.; Ziller, J. W.; Borovik, A. S. Iron(II) Complexes Supported by Sulfonamido Tripodal Ligands: Endogenous versus Exogenous Substrate Oxidation. *Inorg. Chem.* **2014**, *53* (20), 11029–11035 DOI: 10.1021/ic501531g.
- (59) Boeser, C. L.; Holder, J. C.; Taylor, B. L. H.; Houk, K. N.; Stoltz, B. M.; Zare, R. N. Mechanistic Analysis of an Asymmetric Palladium-Catalyzed Conjugate Addition of Arylboronic Acids to β-Substituted Cyclic Enones. *Chem Sci* **2015**, *6* (3), 1917–1922 DOI: 10.1039/C4SC03337J.
- (60) Yamaguchi, A. D.; Chepiga, K. M.; Yamaguchi, J.; Itami, K.; Davies, H. M. L. Concise Syntheses of Dictyodendrins A and F by a Sequential C–H Functionalization Strategy. *J. Am. Chem. Soc.* **2015**, *137* (2), 644–647 DOI: 10.1021/ja512059d.
- (61) Morton, D.; Blakey, S. B. Expanding the Carbene C–H Insertion Toolbox. *ChemCatChem* **2015**, *7* (4), 577–578 DOI: 10.1002/cctc.201402945.
- (62) He, J.; Hamann, L. G.; Davies, H. M. L.; Beckwith, R. E. J. Late-Stage C–H Functionalization of Complex Alkaloids and Drug Molecules via Intermolecular Rhodium-Carbenoid Insertion. *Nat. Commun.* **2015**, *6*, 5943 DOI: 10.1038/ncomms6943.
- (63) Toutov, A. A.; Liu, W.-B.; Betz, K. N.; Fedorov, A.; Stoltz, B. M.; Grubbs, R. H. Silylation of C–H Bonds in Aromatic Heterocycles by an Earth-Abundant Metal Catalyst. *Nature* **2015**, *518* (7537), 80–84 DOI: 10.1038/nature14126.
- (64) Bedell, T. A.; Hone, G. A. B.; Du Bois, J.; Sorensen, E. J. An Expedient Synthesis of Maraviroc (UK-427,857) via C–H Functionalization. *Tetrahedron Lett.* **2015**, *56* (23), 3620–3623 DOI: 10.1016/j.tetlet.2015.01.074.
- (65) Lu, Y.; Wang, H.-W.; Spangler, J. E.; Chen, K.; Cui, P.-P.; Zhao, Y.; Sun, W.-Y.; Yu, J.-Q. Rh(III)-Catalyzed C–H Olefination of N-Pentafluoroaryl Benzamides Using Air as the Sole Oxidant. *Chem Sci* **2015**, *6* (3), 1923–1927 DOI: 10.1039/C4SC03350G.



- (66) Haines, B. E.; Musaev, D. G. Factors Impacting the Mechanism of the Mono-N-Protected Amino Acid Ligand-Assisted and Directing-Group-Mediated C–H Activation Catalyzed by Pd(II) Complex. *ACS Catal.* **2015**, *5* (2), 830–840 DOI: 10.1021/cs5014706.
- (67) Wang, H.-L.; Shang, M.; Sun, S.-Z.; Zhou, Z.-L.; Laforteza, B. N.; Dai, H.-X.; Yu, J.-Q. Cu(II)-Catalyzed Coupling of Aromatic C–H Bonds with Malonates. *Org. Lett.* **2015**, *17* (5), 1228–1231 DOI: 10.1021/acs.orglett.5b00193.
- (68) Blakey, S.; Mace Weldy, N. C–N Bond Formation by C–H Functionalization via metal-catalyzed nitrene insertion. In *Catalytic Transformations via C–H Activation 2*; **2015**, Section 12, p249-286, Ed. J.Q. Yu, Wiley.
- (69) Kang, X.; Zhang, J.; O'Neil, D.; Rojas, A. J.; Chen, W.; Szymanski, P.; Marder, S. R.; El-Sayed, M. A. Effect of Molecular Structure Perturbations on the Performance of the D–A– $\pi$ –A Dye Sensitized Solar Cells. *Chem. Mater.* **2014**, *26* (15), 4486–4493 DOI: 10.1021/cm5016355.
- (70) Kang, X.; Zhang, J.; Rojas, A. J.; O'Neil, D.; Szymanski, P.; Marder, S. R.; El-Sayed, M. A. Deposition of Loosely Bound Organic D–A– $\pi$ –A' Dyes on Sensitized TiO<sub>2</sub> Film: A Possible Strategy to Suppress Charge Recombination and Enhance Power Conversion Efficiency in Dye-Sensitized Solar Cells. *J. Mater. Chem. A* **2014**, *2* (29), 11229 DOI: 10.1039/c4ta02111h.
- (71) Berry, J. F. Metal–metal Multiple Bonded Intermediates in Catalysis. *J. Chem. Sci.* **2015**, *127* (2), 209–214 DOI: 10.1007/s12039-015-0773-6.
- (72) Bess, E. N.; Guptill, D. M.; Davies, H. M. L.; Sigman, M. S. Using IR Vibrations to Quantitatively Describe and Predict Site-Selectivity in Multivariate Rh-Catalyzed C–H Functionalization. *Chem Sci* **2015**, *6* (5), 3057–3062 DOI: 10.1039/C5SC00357A.
- (73) He, J.; Takise, R.; Fu, H.; Yu, J.-Q. Ligand-Enabled Cross-Coupling of C(sp<sup>3</sup>)–H Bonds with Arylsilanes. *J. Am. Chem. Soc.* **2015**, *137* (14), 4618–4621 DOI: 10.1021/jacs.5b00890.
- (74) Moschetta, E. G.; Negretti, S.; Chepiga, K. M.; Brunelli, N. A.; Labreche, Y.; Feng, Y.; Rezaei, F.; Lively, R. P.; Koros, W. J.; Davies, H. M. L.; Jones, C. W. Composite Polymer/Oxide Hollow Fiber Contactors: Versatile and Scalable Flow Reactors for Heterogeneous Catalytic Reactions in Organic Synthesis. *Angew. Chem. Int. Ed.* **2015**, *54* (22), 6470–6474 DOI: 10.1002/anie.201500841.
- (75) He, J.; Shigenari, T.; Yu, J.-Q. Palladium(0)/PAr<sub>3</sub>-Catalyzed Intermolecular Amination of C(sp<sup>3</sup>)–H Bonds: Synthesis of  $\beta$ -Amino Acids. *Angew. Chem. Int. Ed.* **2015**, *54* (22), 6545–6549 DOI: 10.1002/anie.201502075.
- (76) Olson, D. E.; Su, J. Y.; Roberts, D. A.; Du Bois, J. Vicinal Diamination of Alkenes under Rh-Catalysis. *J. Am. Chem. Soc.* **2014**, *136* (39), 13506–13509 DOI: 10.1021/ja506532h.
- (77) Masarwa, A.; Weber, M.; Sarpong, R. Selective C–C and C–H Bond Activation/Cleavage of Pinene Derivatives: Synthesis of Enantiopure Cyclohexenone Scaffolds and Mechanistic Insights. *J. Am. Chem. Soc.* **2015**, *137* (19), 6327–6334 DOI: 10.1021/jacs.5b02254.
- (78) Varela-Alvarez, A.; Musaev, D. G. Fundamental Aspects of the Metal-Catalyzed C–H Bond Functionalization by Diazocarbenes: Guiding Principles for Design of Catalyst with Non-Redox-Active Metal (Such as Ca) and Non-Innocent Ligand. In *Understanding Organometallic Reaction*

*Mechanisms and Catalysis*; Ananikov, V. P., Ed.; Wiley-VCH Verlag GmbH & Co. KGaA, 2014; pp 17–40.

- (79) Jiang, J.; Yu, J.-Q.; Morokuma, K. Mechanism and Stereoselectivity of Directed C(sp<sup>3</sup>)-H Activation and Arylation Catalyzed by Pd(II) with Pyridine Ligand and Trifluoroacetate: A Computational Study. *ACS Catal.* **2015**, *5* (6), 3648–3661 DOI: 10.1021/cs501626n.
- (80) Negretti, S.; Cohen, C. M.; Chang, J. J.; Guptill, D. M.; Davies, H. M. L. Enantioselective dirhodium(II)-Catalyzed Cyclopropanations with Trimethylsilylethyl and Trichloroethyl Aryldiazoacetates. *Tetrahedron* **2015**, *71* (39), 7415–7420 DOI: 10.1016/j.tet.2015.05.045.
- (81) Schafer, A. G.; Blakey, S. B. Ir-Catalyzed Enantioselective Group Transfer Reactions. *Chem Soc Rev* **2015**, *44* (17), 5969–5980 DOI: 10.1039/C5CS00354G.
- (82) Zhu, C.; Liang, Y.; Hong, X.; Sun, H.; Sun, W.-Y.; Houk, K. N.; Shi, Z. Iodoarene-Catalyzed Stereospecific Intramolecular Sp<sup>3</sup> C–H Amination: Reaction Development and Mechanistic Insights. *J. Am. Chem. Soc.* **2015**, *137* (24), 7564–7567 DOI: 10.1021/jacs.5b03488.
- (83) Cheng, G.-J.; Chen, P.; Sun, T.-Y.; Zhang, X.; Yu, J.-Q.; Wu, Y.-D. A Combined IM-MS/DFT Study on [Pd(MPAA)]-Catalyzed Enantioselective C–H Activation: Relay of Chirality through a Rigid Framework. *Chem. - Eur. J.* **2015**, *21* (31), 11180–11188 DOI: 10.1002/chem.201501123.
- (84) Lindsay, V. N. G.; Viart, H. M.-F.; Sarpong, R. Stereodivergent Intramolecular C(sp<sup>3</sup>)-H Functionalization of Azavinyl Carbenes: Synthesis of Saturated Heterocycles and Fused *N*-Heterotricycles. *J. Am. Chem. Soc.* **2015**, *137* (26), 8368–8371 DOI: 10.1021/jacs.5b04295.
- (85) Nett, A. J.; Zhao, W.; Zimmerman, P. M.; Montgomery, J. Highly Active Nickel Catalysts for C–H Functionalization Identified through Analysis of Off-Cycle Intermediates. *J. Am. Chem. Soc.* **2015**, *137* (24), 7636–7639 DOI: 10.1021/jacs.5b04548.
- (86) Muto, K.; Yamaguchi, J.; Musaev, D. G.; Itami, K. Decarbonylative Organoboron Cross-Coupling of Esters by Nickel Catalysis. *Nat. Commun.* **2015**, *6*, 7508 DOI: 10.1038/ncomms8508.
- (87) Narayan, A. R. H.; Jiménez-Osés, G.; Liu, P.; Negretti, S.; Zhao, W.; Gilbert, M. M.; Ramabhadran, R. O.; Yang, Y.-F.; Furan, L. R.; Li, Z.; Podust, L. M.; Montgomery, J.; Houk, K. N.; Sherman, D. H. Enzymatic Hydroxylation of an Unactivated Methylene C–H Bond Guided by Molecular Dynamics Simulations. *Nat. Chem.* **2015**, *7* (8), 653–660 DOI: 10.1038/nchem.2285.
- (88) Haines, B. E.; Xu, H.; Verma, P.; Wang, X.-C.; Yu, J.-Q.; Musaev, D. G. Mechanistic Details of Pd(II)-Catalyzed C–H Iodination with Molecular I<sub>2</sub>: Oxidative Addition vs Electrophilic Cleavage. *J. Am. Chem. Soc.* **2015**, *137* (28), 9022–9031 DOI: 10.1021/jacs.5b03410.
- (89) Neufeldt, S. R.; Jiménez-Osés, G.; Huckins, J. R.; Thiel, O. R.; Houk, K. N. Pyridine *N*-Oxide vs Pyridine Substrates for Rh(III)-Catalyzed Oxidative C–H Bond Functionalization. *J. Am. Chem. Soc.* **2015**, *137* (31), 9843–9854 DOI: 10.1021/jacs.5b03535.
- (90) Schofield, M. M.; Jain, S.; Porat, D.; Dick, G. J.; Sherman, D. H. Identification and Analysis of the Bacterial Endosymbiont Specialized for Production of the Chemotherapeutic Natural Product ET-743: Metagenomic Analysis of the ET-743 Producer. *Environ. Microbiol.* **2015**, *17* (10), 3964–3975 DOI: 10.1111/1462-2920.12908.
- (91) Xu, H.; Shang, M.; Dai, H.-X.; Yu, J.-Q. Ligand-Controlled *Para*-Selective C–H Arylation of Monosubstituted Arenes. *Org. Lett.* **2015**, *17* (15), 3830–3833 DOI: 10.1021/acs.orglett.5b01802.

- (92) Srivastava, P.; Yang, H.; Ellis-Guardiola, K.; Lewis, J. C. Engineering a Dirhodium Artificial Metalloenzyme for Selective Olefin Cyclopropanation. *Nat. Commun.* **2015**, *6*, 7789 DOI: 10.1038/ncomms8789.
- (93) Villanueva, O.; Weldy, N. M.; Blakey, S. B.; MacBeth, C. E. Cobalt Catalyzed  $Sp^3$  C–H Amination Utilizing Aryl Azides. *Chem Sci* **2015**, *6* (11), 6672–6675 DOI: 10.1039/C5SC01162K.
- (94) Xing, X.; O'Connor, N. R.; Stoltz, B. M. Palladium(II)-Catalyzed Allylic C–H Oxidation of Hindered Substrates Featuring Tunable Selectivity Over Extent of Oxidation. *Angew. Chem. Int. Ed.* **2015**, *54* (38), 11186–11190 DOI: 10.1002/anie.201504007.
- (95) Chemler, J. A.; Tripathi, A.; Hansen, D. A.; O'Neil-Johnson, M.; Williams, R. B.; Starks, C.; Park, S. R.; Sherman, D. H. Evolution of Efficient Modular Polyketide Synthases by Homologous Recombination. *J. Am. Chem. Soc.* **2015**, 150813154906004 DOI: 10.1021/jacs.5b04842.
- (96) Sun, S.-Z.; Shang, M.; Wang, H.-L.; Lin, H.-X.; Dai, H.-X.; Yu, J.-Q. Cu(II)-Mediated  $C(sp^2)$ -H Hydroxylation. *J. Org. Chem.* **2015**, *80* (17), 8843–8848 DOI: 10.1021/acs.joc.5b01351.
- (97) Cheng, G.; Li, T.-J.; Yu, J.-Q. Practical Pd(II)-Catalyzed C–H Alkylation with Epoxides: One-Step Syntheses of 3,4-Dihydroisocoumarins. *J. Am. Chem. Soc.* **2015**, *137* (34), 10950–10953 DOI: 10.1021/jacs.5b07507.
- (98) Adams, T. C.; Payette, J. N.; Cheah, J. H.; Movassaghi, M. Concise Total Synthesis of (+)-Luteoalbusins A and B. *Org. Lett.* **2015**, *17* (17), 4268–4271 DOI: 10.1021/acs.orglett.5b02059.
- (99) Lee, J. K.; Banerjee, S.; Nam, H. G.; Zare, R. N. Acceleration of Reaction in Charged Microdroplets. *Q. Rev. Biophys.* **2015**, *48* (04), 437–444 DOI: 10.1017/S0033583515000086.
- (100) Banerjee, S.; Zare, R. N. Syntheses of Isoquinoline and Substituted Quinolines in Charged Microdroplets. *Angew. Chem. Int. Ed.* **2015**, *54* (49), 14795–14799 DOI: 10.1002/anie.201507805.
- (101) Ji, Y.; Plata, R. E.; Regens, C. S.; Hay, M.; Schmidt, M.; Razler, T.; Qiu, Y.; Geng, P.; Hsiao, Y.; Rosner, T.; Eastgate, M. D.; Blackmond, D. G. Mono-Oxidation of Bidentate Bis-Phosphines in Catalyst Activation: Kinetic and Mechanistic Studies of a Pd/Xantphos-Catalyzed C–H Functionalization. *J. Am. Chem. Soc.* **2015**, *137* (41), 13272–13281 DOI: 10.1021/jacs.5b01913.
- (102) Cernak, T.; Dykstra, K. D.; Tyagarajan, S.; Vachal, P.; Krska, S. W. The Medicinal Chemist's Toolbox for Late Stage Functionalization of Drug-like Molecules. *Chem Soc Rev* **2016**, *45* (3), 546–576 DOI: 10.1039/C5CS00628G.
- (103) Baxter, R. D.; Liang, Y.; Hong, X.; Brown, T. A.; Zare, R. N.; Houk, K. N.; Baran, P. S.; Blackmond, D. G. Mechanistic Insights into Two-Phase Radical C–H Arylations. *ACS Cent. Sci.* **2015**, *1* (8), 456–462 DOI: 10.1021/acscentsci.5b00332.
- (104) Adams, A. M.; Du Bois, J.; Malik, H. A. Comparative Study of the Limitations and Challenges in Atom-Transfer C–H Oxidations. *Org. Lett.* **2015**, *17* (24), 6066–6069 DOI: 10.1021/acs.orglett.5b03047.
- (105) Toutov, A. A.; Liu, W.-B.; Betz, K. N.; Stoltz, B. M.; Grubbs, R. H. Catalytic C–H Bond Silylation of Aromatic Heterocycles. *Nat. Protoc.* **2015**, *10* (12), 1897–1903 DOI: 10.1038/nprot.2015.118.

- (106) Sunderland, T. L.; Berry, J. F. Expanding the Family of Heterobimetallic Bi–Rh Paddlewheel Carboxylate Complexes via Equatorial Carboxylate Exchange. *Dalton Trans* **2016**, 45 (1), 50–55 DOI: 10.1039/C5DT03740A.
- (107) West, J. G.; Huang, D.; Sorensen, E. J. Acceptorless Dehydrogenation of Small Molecules through Cooperative Base Metal Catalysis. *Nat. Commun.* **2015**, 6, 10093 DOI: 10.1038/ncomms10093.
- (108) He, J.; Jiang, H.; Takise, R.; Zhu, R.-Y.; Chen, G.; Dai, H.-X.; Dhar, T. G. M.; Shi, J.; Zhang, H.; Cheng, P. T. W.; Yu, J.-Q. Ligand-Promoted Borylation of C(sp<sup>3</sup>)–H Bonds with Palladium(II) Catalysts. *Angew. Chem. Int. Ed.* **2016**, 55 (2), 785–789 DOI: 10.1002/anie.201509996.
- (109) Zhang, J.; Parker, T. C.; Chen, W.; Williams, L.; Khrustalev, V. N.; Jucov, E. V.; Barlow, S.; Timofeeva, T. V.; Marder, S. R. C–H-Activated Direct Arylation of Strong Benzothiadiazole and Quinoxaline-Based Electron Acceptors. *J. Org. Chem.* **2016**, 81 (2), 360–370 DOI: 10.1021/acs.joc.5b02551.
- (110) Haines, B. E.; Berry, J. F.; Yu, J.-Q.; Musaev, D. G. Factors Controlling Stability and Reactivity of Dimeric Pd(II) Complexes in C–H Functionalization Catalysis. *ACS Catal.* **2016**, 6 (2), 829–839 DOI: 10.1021/acscatal.5b02447.
- (111) Li, S.; Lowell, A. N.; Yu, F.; Raveh, A.; Newmister, S. A.; Bair, N.; Schaub, J. M.; Williams, R. M.; Sherman, D. H. Hapalindole/Ambiguine Biogenesis Is Mediated by a Cope Rearrangement, C–C Bond-Forming Cascade. *J. Am. Chem. Soc.* **2015**, 137 (49), 15366–15369 DOI: 10.1021/jacs.5b10136.
- (112) Corcos, A. R.; Villanueva, O.; Walroth, R. C.; Sharma, S. K.; Bacsa, J.; Lancaster, K. M.; MacBeth, C. E.; Berry, J. F. Oxygen Activation by Co(II) and a Redox Non-Innocent Ligand: Spectroscopic Characterization of a Radical–Co(II)–Superoxide Complex with Divergent Catalytic Reactivity. *J. Am. Chem. Soc.* **2016**, 138 (6), 1796–1799 DOI: 10.1021/jacs.5b12643.
- (113) Varela-Álvarez, A.; Yang, T.; Jennings, H.; Kornecki, K. P.; Macmillan, S. N.; Lancaster, K. M.; Mack, J. B. C.; Du Bois, J.; Berry, J. F.; Musaev, D. G. Rh<sub>2</sub> (II,III) Catalysts with Chelating Carboxylate and Carboxamidate Supports: Electronic Structure and Nitrene Transfer Reactivity. *J. Am. Chem. Soc.* **2016**, 138 (7), 2327–2341 DOI: 10.1021/jacs.5b12790.
- (114) Amaike, K.; Loach, R. P.; Movassaghi, M. Direct C7 Functionalization of Tryptophan. Synthesis of Methyl (S)-2-((tert-Butoxycarbonyl)amino)-3-(7-(4,4,5,5-Tetramethyl-1,3,2-Dioxaborolan-2-Yl)-1H-Indol-3-Yl)propanoate. *Org. Synth. Annu. Publ. Satisf. Methods Prep. Org. Chem.* **2015**, 92, 373–385 DOI: 10.15227/orgsyn.092.0373.
- (115) O'Connor, N. R.; Wood, J. L.; Stoltz, B. M. Synthetic Applications and Methodological Developments of Donor–Acceptor Cyclopropanes and Related Compounds. *Isr. J. Chem.* **2016**, 56 (6-7), 431–444 DOI: 10.1002/ijch.201500089.
- (116) Weldy, N. M.; Schafer, A. G.; Owens, C. P.; Herting, C. J.; Varela-Alvarez, A.; Chen, S.; Niemeyer, Z.; Musaev, D. G.; Sigman, M. S.; Davies, H. M. L.; Blakey, S. B. Iridium(III)-Bis(imidazolyl)phenyl Catalysts for Enantioselective C–H Functionalization with Ethyl Diazoacetate. *Chem Sci* **2016**, 7 (5), 3142–3146 DOI: 10.1039/C6SC00190D.
- (117) Davies, H. M. L.; Morton, D. Recent Advances in C–H Functionalization. *J. Org. Chem.* **2016**, 81 (2), 343–350 DOI: 10.1021/acs.joc.5b02818.

- (118) Kong, W.-J.; Liu, Y.-J.; Xu, H.; Chen, Y.-Q.; Dai, H.-X.; Yu, J.-Q. Pd-Catalyzed  $\alpha$ -Selective C–H Functionalization of Olefins: En Route to 4-Imino- $\beta$ -Lactams. *J. Am. Chem. Soc.* **2016**, *138* (7), 2146–2149 DOI: 10.1021/jacs.5b13353.
- (119) Andorfer, M. C.; Park, H. J.; Vergara-Coll, J.; Lewis, J. C. Directed Evolution of RebH for Catalyst-Controlled Halogenation of Indole C–H Bonds. *Chem Sci* **2016**, *7* (6), 3720–3729 DOI: 10.1039/C5SC04680G.
- (120) Yang, Z.; Yu, P.; Houk, K. N. Molecular Dynamics of Dimethyldioxirane C–H Oxidation. *J. Am. Chem. Soc.* **2016**, *138* (12), 4237–4242 DOI: 10.1021/jacs.6b01028.
- (121) Shi, Q.; Zhang, S.; Zhang, J.; Oswald, V. F.; Amassian, A.; Marder, S. R.; Blakey, S. B.  $KO^t$  Bu-Initiated Aryl C–H Iodination: A Powerful Tool for the Synthesis of High Electron Affinity Compounds. *J. Am. Chem. Soc.* **2016**, *138* (12), 3946–3949 DOI: 10.1021/jacs.5b12259.
- (122) Suraru, S. L.; Lee, J. A.; Luscombe, C. K.; Preparation of an Arylated Alkylthiophene Monomer via C–H Activation for Use in Pd-PEPPSI-*i*Pr Catalyzed-Controlled Chain Growth Polymerization, *ACS Macro Letters*, **2016**, *5*, 533-536 DOI:10.1021/acsmacrolett.6b00062.
- (123) Fu, L.; Guptill, D. M.; Davies, H. M. L. Rhodium(II)-Catalyzed C–H Functionalization of Electron-Deficient Methyl Groups. *J. Am. Chem. Soc.* **2016**, *138* (18), 5761–5764 DOI: 10.1021/jacs.6b01941.
- (124) Sunderland, T. L.; Berry, J. F. The First bismuth(II)–rhodium(II) Oxypyridinate Paddlewheel Complexes: Synthesis and Structural Characterization. *J. Coord. Chem.* **2016**, *69* (11-13), 1949–1956 DOI: 10.1080/00958972.2016.1177178.
- (125) Liao, K.; Negretti, S.; Musaev, D. G.; Bacsa, J.; Davies, H. M. L. Site-Selective and Stereoselective Functionalization of Unactivated C–H Bonds. *Nature* **2016**, *533* (7602), 230–234 DOI: 10.1038/nature17651.
- (126) Gwon, D.; Hwang, H.; Kim, H. K.; Marder, S. R.; Chang, S. Synthesis of 8-Aminoquinolines by Using Carbamate Reagents: Facile Installation and Deprotection of Practical Amidating Groups. *Chem. - Eur. J.* **2015**, *21* (48), 17200–17204 DOI: 10.1002/chem.201503511.
- (127) Sigman, M. S.; Harper, K. C.; Bess, E. N.; Milo, A. The Development of Multidimensional Analysis Tools for Asymmetric Catalysis and Beyond. *Acc. Chem. Res.* **2016**, *49* (6), 1292–1301 DOI: 10.1021/acs.accounts.6b00194.
- (128) Suraru, S.-L.; Lee, J. A.; Luscombe, C. K. C–H Arylation in the Synthesis of  $\pi$ -Conjugated Polymers. *ACS Macro Lett.* **2016**, *5* (6), 724–729 DOI: 10.1021/acsmacrolett.6b00279.
- (129) Bedell, T. A.; Hone, G. A. B.; Valette, D.; Yu, J.-Q.; Davies, H. M. L.; Sorensen, E. J. Rapid Construction of a Benzo-Fused Indoxamycin Core Enabled by Site-Selective C–H Functionalizations. *Angew. Chem. Int. Ed.* **2016**, *55* (29), 8270–8274 DOI: 10.1002/anie.201602024.
- (130) West, J. G.; Bedell, T. A.; Sorensen, E. J. The Uranyl Cation as a Visible-Light Photocatalyst for  $C(sp^3)$ -H Fluorination. *Angew. Chem. Int. Ed.* **2016**, *55* (31), 8923–8927 DOI: 10.1002/anie.201603149.

- (131) Lee, L.-C.; He, J.; Yu, J.-Q.; Jones, C. W. Functionalized Polymer-Supported Pyridine Ligands for Palladium-Catalyzed C(sp<sup>3</sup>)-H Arylation. *ACS Catal.* **2016**, *6* (8), 5245–5250 DOI: 10.1021/acscatal.6b01774.
- (132) DeMars, M. D.; Sheng, F.; Park, S. R.; Lowell, A. N.; Podust, L. M.; Sherman, D. H. Biochemical and Structural Characterization of MycCl, a Versatile P450 Biocatalyst from the Mycinamicin Biosynthetic Pathway. *ACS Chem. Biol.* **2016**, *11* (9), 2642–2654 DOI: 10.1021/acscchembio.6b00479.
- (133) White, K. L.; Movassaghi, M. Concise Total Syntheses of (+)-Haplocidine and (+)-Haplocine via Late-Stage Oxidation of (+)-Fendleridine Derivatives. *J. Am. Chem. Soc.* **2016**, *138* (35), 11383–11389 DOI: 10.1021/jacs.6b07623.
- (134) Leal, R. A.; Bischof, C.; Lee, Y. V.; Sawano, S.; McAtee, C. C.; Latimer, L. N.; Russ, Z. N.; Dueber, J. E.; Yu, J.-Q.; Sarpong, R. Application of a Palladium-Catalyzed C-H Functionalization/Indolization Method to Syntheses of *cis*-Triketrin A and Herbindole B. *Angew. Chem.* **2016**, *128* (39), 12003–12007 DOI: 10.1002/ange.201605475.
- (135) Shang, M.; Shao, Q.; Sun, S.-Z.; Chen, Y.-Q.; Xu, H.; Dai, H.-X.; Yu, J.-Q. Identification of Monodentate Oxazoline as a Ligand for Copper-Promoted Ortho-C-H Hydroxylation and Amination. *Chem Sci* **2017**, *8* (2), 1469–1473 DOI: 10.1039/C6SC03383K.
- (136) Kim, K. E.; Li, J.; Grubbs, R. H.; Stoltz, B. M. Catalytic Anti-Markovnikov Transformations of Hindered Terminal Alkenes Enabled by Aldehyde-Selective Wacker-Type Oxidation. *J. Am. Chem. Soc.* **2016**, *138* (40), 13179–13182 DOI: 10.1021/jacs.6b08788.
- (137) Chen, G.; Gong, W.; Zhuang, Z.; Andrä, M. S.; Chen, Y.-Q.; Hong, X.; Yang, Y.-F.; Liu, T.; Houk, K. N.; Yu, J.-Q. Ligand-Accelerated Enantioselective Methylene C(sp<sup>3</sup>)-H Bond Activation. *Science* **2016**, *353* (6303), 1023–1027 DOI: 10.1126/science.aaf4434.
- (138) Haines, B. E.; Saito, Y.; Segawa, Y.; Itami, K.; Musaev, D. G. Flexible Reaction Pocket on Bulky Diphosphine-Ir Complex Controls Regioselectivity in *para*-Selective C-H Borylation of Arenes. *ACS Catal.* **2016**, *6* (11), 7536–7546 DOI: 10.1021/acscatal.6b02317.
- (139) Liu, W.-B.; Schuman, D. P.; Yang, Y.-F.; Toutov, A. A.; Liang, Y.; Klare, H. F. T.; Nesnas, N.; Oestreich, M.; Blackmond, D. G.; Virgil, S. C.; Banerjee, S.; Zare, R. N.; Grubbs, R. H.; Houk, K. N.; Stoltz, B. M. Potassium *tert*-Butoxide-Catalyzed Dehydrogenative C-H Silylation of Heteroaromatics: A Combined Experimental and Computational Mechanistic Study. *J. Am. Chem. Soc.* **2017**, *139* (20), 6867–6879 DOI: 10.1021/jacs.6b13031.
- (140) Dolan, N. S.; Scamp, R. J.; Yang, T.; Berry, J. F.; Schomaker, J. M. Catalyst-Controlled and Tunable, Chemoselective Silver-Catalyzed Intermolecular Nitrene Transfer: Experimental and Computational Studies. *J. Am. Chem. Soc.* **2016**, *138* (44), 14658–14667 DOI: 10.1021/jacs.6b07981.
- (141) Yang, Y.-F.; Houk, K. N.; Wu, Y.-D. Computational Exploration of Rh<sup>III</sup>/Rh<sup>V</sup> and Rh<sup>III</sup>/Rh<sup>I</sup> Catalysis in Rhodium(III)-Catalyzed C-H Activation Reactions of *N*-Phenoxyacetamides with Alkynes. *J. Am. Chem. Soc.* **2016**, *138* (21), 6861–6868 DOI: 10.1021/jacs.6b03424.
- (142) Kim, K. E.; Stoltz, B. M. A Second-Generation Synthesis of the Cyanthiwigin Natural Product Core. *Org. Lett.* **2016**, *18* (21), 5720–5723 DOI: 10.1021/acs.orglett.6b02962.

- (143) Haines, B. E.; Kawakami, T.; Kuwata, K.; Murakami, K.; Itami, K.; Musaev, D. G. Cu-Catalyzed Aromatic C–H Imidation with N-Fluorobenzenesulfonimide: Mechanistic Details and Predictive Models. *Chem Sci* **2017**, *8* (2), 988–1001 DOI: 10.1039/C6SC04145K.
- (144) McLarney, B. D.; Cavitt, M. A.; Donnell, T. M.; Musaev, D. G.; France, S. Rh<sup>II</sup>-Catalyzed  $\beta$ -C(sp<sup>2</sup>)–H Alkylation of Enol Ethers, Enamides and Enecarbamates with  $\alpha$ -Diazo Dicarbonyl Compounds. *Chem. - Eur. J.* **2017**, *23* (5), 1129–1135 DOI: 10.1002/chem.201604518.
- (145) Toutov, A. A.; Betz, K. N.; Haibach, M. C.; Romine, A. M.; Grubbs, R. H. Sodium Hydroxide Catalyzed Dehydrocoupling of Alcohols with Hydrosilanes. *Org. Lett.* **2016**, *18* (22), 5776–5779 DOI: 10.1021/acs.orglett.6b01687.
- (146) Liu, T.; Myers, M. C.; Yu, J.-Q. Copper-Catalyzed Bromination of C(sp<sup>3</sup>)–H Bonds Distal to Functional Groups. *Angew. Chem.* **2017**, *129* (1), 312–315 DOI: 10.1002/ange.201608210.
- (147) Sathyamoorthi, S.; Du Bois, J. Copper-Catalyzed Oxidative Cyclization of Carboxylic Acids. *Org. Lett.* **2016**, *18* (24), 6308–6311 DOI: 10.1021/acs.orglett.6b03176.
- (148) Abrams, D. J.; West, J. G.; Sorensen, E. J. Toward a Mild Dehydroformylation Using Base-Metal Catalysis. *Chem Sci* **2017**, *8* (3), 1954–1959 DOI: 10.1039/C6SC04607J.
- (149) Toutov, A. A.; Betz, K. N.; Schuman, D. P.; Liu, W.-B.; Fedorov, A.; Stoltz, B. M.; Grubbs, R. H. Alkali Metal-Hydroxide-Catalyzed C(sp)–H Bond Silylation. *J. Am. Chem. Soc.* **2017**, *139* (4), 1668–1674 DOI: 10.1021/jacs.6b12114.
- (150) Viart, H. M.-F.; Bachmann, A.; Kayitare, W.; Sarpong, R.  $\beta$ -Carboline Amides as Intrinsic Directing Groups for C(sp<sup>2</sup>)–H Functionalization. *J. Am. Chem. Soc.* **2017**, *139* (3), 1325–1329 DOI: 10.1021/jacs.6b12569.
- (151) Fu, L.; Mighion, J. D.; Voight, E. A.; Davies, H. M. L. Synthesis of 2,2,2-Trichloroethyl Aryl- and Vinyldiazoacetates by Palladium-Catalyzed Cross-Coupling. *Chem. - Eur. J.* **2017**, *23* (14), 3272–3275 DOI: 10.1002/chem.201700101.
- (152) West, J. G.; Sorensen, E. J. Development of a Bio-Inspired Dual Catalytic System for Alkane Dehydrogenation. *Isr. J. Chem.* **2017**, *57* (3-4), 259–269 DOI: 10.1002/ijch.201600115.
- (153) Toutov, A. A.; Salata, M.; Fedorov, A.; Yang, Y.-F.; Liang, Y.; Cariou, R.; Betz, K. N.; Couzijn, E. P. A.; Shabaker, J. W.; Houk, K. N.; Grubbs, R. H. A Potassium Tert-Butoxide and Hydrosilane System for Ultra-Deep Desulfurization of Fuels. *Nat. Energy* **2017**, *2* (3), 17008 DOI: 10.1038/nenergy.2017.8.
- (154) Upp, D. M.; Lewis, J. C. Selective C–H Bond Functionalization Using Repurposed or Artificial Metalloenzymes. *Curr. Opin. Chem. Biol.* **2017**, *37*, 48–55 DOI: 10.1016/j.cbpa.2016.12.027.
- (155) Chen, X.-Y.; Ozturk, S.; Sorensen, E. J. Synthesis of Fluorenones from Benzaldehydes and Aryl Iodides: Dual C–H Functionalizations Using a Transient Directing Group. *Org. Lett.* **2017**, *19* (5), 1140–1143 DOI: 10.1021/acs.orglett.7b00161.
- (156) Yavuz, I.; Houk, K. N. Mesoscale Ordering and Charge-Transport of Crystalline Spiro-OMeTAD Organic Semiconductors. *J. Phys. Chem. C* **2017**, *121* (2), 993–999 DOI: 10.1021/acs.jpcc.6b08624.

- (157) Li, S.; Lowell, A. N.; Newmister, S. A.; Yu, F.; Williams, R. M.; Sherman, D. H. Decoding Cyclase-Dependent Assembly of Hapalindole and Fischerindole Alkaloids. *Nat. Chem. Biol.* **2017**, *13* (5), 467–469 DOI: 10.1038/nchembio.2327.
- (158) Klare, H. F. T.; Goldberg, A. F. G.; Duquette, D. C.; Stoltz, B. M. Oxidative Fragmentations and Skeletal Rearrangements of Oxindole Derivatives. *Org. Lett.* **2017**, *19* (5), 988–991 DOI: 10.1021/acs.orglett.6b03789.
- (159) Andorfer, M. C.; Grob, J. E.; Hajdin, C. E.; Chael, J. R.; Siuti, P.; Lilly, J.; Tan, K. L.; Lewis, J. C. Understanding Flavin-Dependent Halogenase Reactivity via Substrate Activity Profiling. *ACS Catal.* **2017**, *7* (3), 1897–1904 DOI: 10.1021/acscatal.6b02707.
- (160) Tortoreto, C.; Rackl, D.; Davies, H. M. L. Metal-Free C–H Functionalization of Alkanes by Aryldiazoacetates. *Org. Lett.* **2017**, *19* (4), 770–773 DOI: 10.1021/acs.orglett.6b03681.
- (161) Wang, D.; Stahl, S. S. Pd-Catalyzed Aerobic Oxidative Biaryl Coupling: Non-Redox Cocatalysis by Cu(OTf)<sub>2</sub> and Discovery of Fe(OTf)<sub>3</sub> as a Highly Effective Cocatalyst. *J. Am. Chem. Soc.* **2017**, *139* (16), 5704–5707 DOI: 10.1021/jacs.7b01970.
- (162) Weatherly, C.; Alderson, J. M.; Berry, J. F.; Hein, J. E.; Schomaker, J. M. Catalyst-Controlled Nitrene Transfer by Tuning Metal:Ligand Ratios: Insight into the Mechanisms of Chemoselectivity. *Organometallics* **2017**, *36* (8), 1649–1661 DOI: 10.1021/acs.organomet.7b00190.
- (163) Shang, M.; Wang, M.-M.; Saint-Denis, T. G.; Li, M.-H.; Dai, H.-X.; Yu, J.-Q. Copper-Mediated Late-Stage Functionalization of Heterocycle-Containing Molecules. *Angew. Chem. Int. Ed.* **2017**, *56* (19), 5317–5321 DOI: 10.1002/anie.201611287.
- (164) Toutov, A. A.; Liu, W.-B.; Stoltz, B. M.; Grubbs, R. H. Potassium Tert-Butoxide-Catalyzed Dehydrogenative Cross-Coupling of Heteroarenes with Hydrosilanes. *Org. Synth. Annu. Publ. Satisf. Methods Prep. Org. Chem.* **93**, 263–271 DOI: 10.15227/orgsyn.093.0263.
- (165) Banerjee, S.; Yang, Y.-F.; Jenkins, I. D.; Liang, Y.; Toutov, A. A.; Liu, W.-B.; Schuman, D. P.; Grubbs, R. H.; Stoltz, B. M.; Krenske, E. H.; Houk, K. N.; Zare, R. N. Ionic and Neutral Mechanisms for C–H Bond Silylation of Aromatic Heterocycles Catalyzed by Potassium *tert*-Butoxide. *J. Am. Chem. Soc.* **2017**, *139* (20), 6880–6887 DOI: 10.1021/jacs.6b13032.
- (166) Li, Y.; Shan, C.; Yang, Y.-F.; Shi, F.; Qi, X.; Houk, K. N.; Lan, Y. Mechanism, Regio-, and Diastereoselectivity of Rh(III)-Catalyzed Cyclization Reactions of *N*-Arylnitrones with Alkynes: A Density Functional Theory Study. *J. Phys. Chem. A* **2017**, *121* (23), 4496–4504 DOI: 10.1021/acs.jpca.7b01020.
- (167) Li, Y.; Tatum, W. K.; Onorato, J. W.; Barajas, S. D.; Yang, Y. Y.; Luscombe, C. K. An Indacenodithiophene-Based Semiconducting Polymer with High Ductility for Stretchable Organic Electronics. *Polym Chem* **2017** DOI: 10.1039/C7PY00435D.
- (168) Lowell, A. N.; DeMars, M. D.; Slocum, S. T.; Yu, F.; Anand, K.; Chemler, J. A.; Korakavi, N.; Priessnitz, J. K.; Park, S. R.; Koch, A. A.; Schultz, P. J.; Sherman, D. H. Chemoenzymatic Total Synthesis and Structural Diversification of Tylactone-Based Macrolide Antibiotics through Late-Stage Polyketide Assembly, Tailoring, and C–H Functionalization. *J. Am. Chem. Soc.* **2017**, *139* (23), 7913–7920 DOI: 10.1021/jacs.7b02875.
- (169) Plata, R. E.; Hill, D. E.; Haines, B. E.; Musaev, D. G.; Chu, L.; Hickey, D. P.; Sigman, M. S.; Yu, J.-Q.; Blackmond, D. G. A Role for Pd(IV) in Catalytic Enantioselective C–H Functionalization with



- Monoprotected Amino Acid Ligands under Mild Conditions. *J. Am. Chem. Soc.* **2017**, *139* (27), 9238–9245 DOI: 10.1021/jacs.7b03716.
- (170) Scott, C. N.; Bisen, M. D.; Stemer, D. M.; McKinnon, S.; Luscombe, C. K. Direct Arylation Polycondensation of 2,5-Dithienylsilole with a Series of Difluorobenzodiimine-Based Electron Acceptors. *Macromolecules* **2017**, *50* (12), 4623–4628 DOI: 10.1021/acs.macromol.7b00046.
- (171) Rackl, D.; Yoo, C.-J.; Jones, C. W.; Davies, H. M. L. Synthesis of Donor/Acceptor-Substituted Diazo Compounds in Flow and Their Application in Enantioselective Dirhodium-Catalyzed Cyclopropanation and C–H Functionalization. *Org. Lett.* **2017**, *19* (12), 3055–3058 DOI: 10.1021/acs.orglett.7b01073.
- (172) Gair, J. J.; Haines, B. E.; Filatov, A. S.; Musaev, D. G.; Lewis, J. C. Mono-N-Protected Amino Acid Ligands Stabilize Dimeric Palladium( >ii</span> ) Complexes of Importance to C–H Functionalization. *Chem Sci* **2017**, *8* (8), 5746–5756 DOI: 10.1039/C7SC01674C.
- (173) Mack, J. B. C.; Gipson, J. D.; Du Bois, J.; Sigman, M. S. Ruthenium-Catalyzed C–H Hydroxylation in Aqueous Acid Enables Selective Functionalization of Amine Derivatives. *J. Am. Chem. Soc.* **2017**, *139* (28), 9503–9506 DOI: 10.1021/jacs.7b05469.
- (174) Yang, Y.-F.; Chen, G.; Hong, X.; Yu, J.-Q.; Houk, K. N. The Origins of Dramatic Differences in Five-Membered vs Six-Membered Chelation of Pd(II) on Efficiency of C(sp<sup>3</sup>)–H Bond Activation. *J. Am. Chem. Soc.* **2017**, *139* (25), 8514–8521 DOI: 10.1021/jacs.7b01801.
- (175) Haines, B. E.; Yu, J.Q.; Musaev, D. J.; Enantioselectivity Model for Pd-Catalyzed C–H Functionalization Mediated by the Mono-N-protected Amino Acid (MPAA) Family of Ligands. *ACS Catalysis*, **2017**, *7*, (7), 4344 DOI: 10.1021/acscatal.7b01281.
- (176) Loskot, S. A.; Romney, D. K.; Arnold, F. H.; Stoltz, B. M. Enantioselective Total Synthesis of Nigelladine A via Late-Stage C–H Oxidation Enabled by an Engineered P450 Enzyme. *J. Am. Chem. Soc.* **2017**, *139* (30), 10196–10199 DOI: 10.1021/jacs.7b05196.
